# Supplementary material for: Vitamin Biosynthesis by Human Gut Butyrate-Producing Bacteria and Cross-Feeding in Synthetic Microbial Communities
Source: PubMed Central journal article supplement (PMC7360928; doi:10.1128/mbio.00886-20), 2020-07-14

## GENERAL EXPLANATIONS

- Precursor in a route; or in a branch or section of a route 
- Final product (cofactor) of the route 
- Catalytic step 

# BIOTIN METABOLISM

**Main route: Synthesis from Malonyl-[acp]**

**Alternative route: Synthesis from Pimelate**

\* Steps that can be catalysed by alternative enzymes

**Final product (Biotin)**

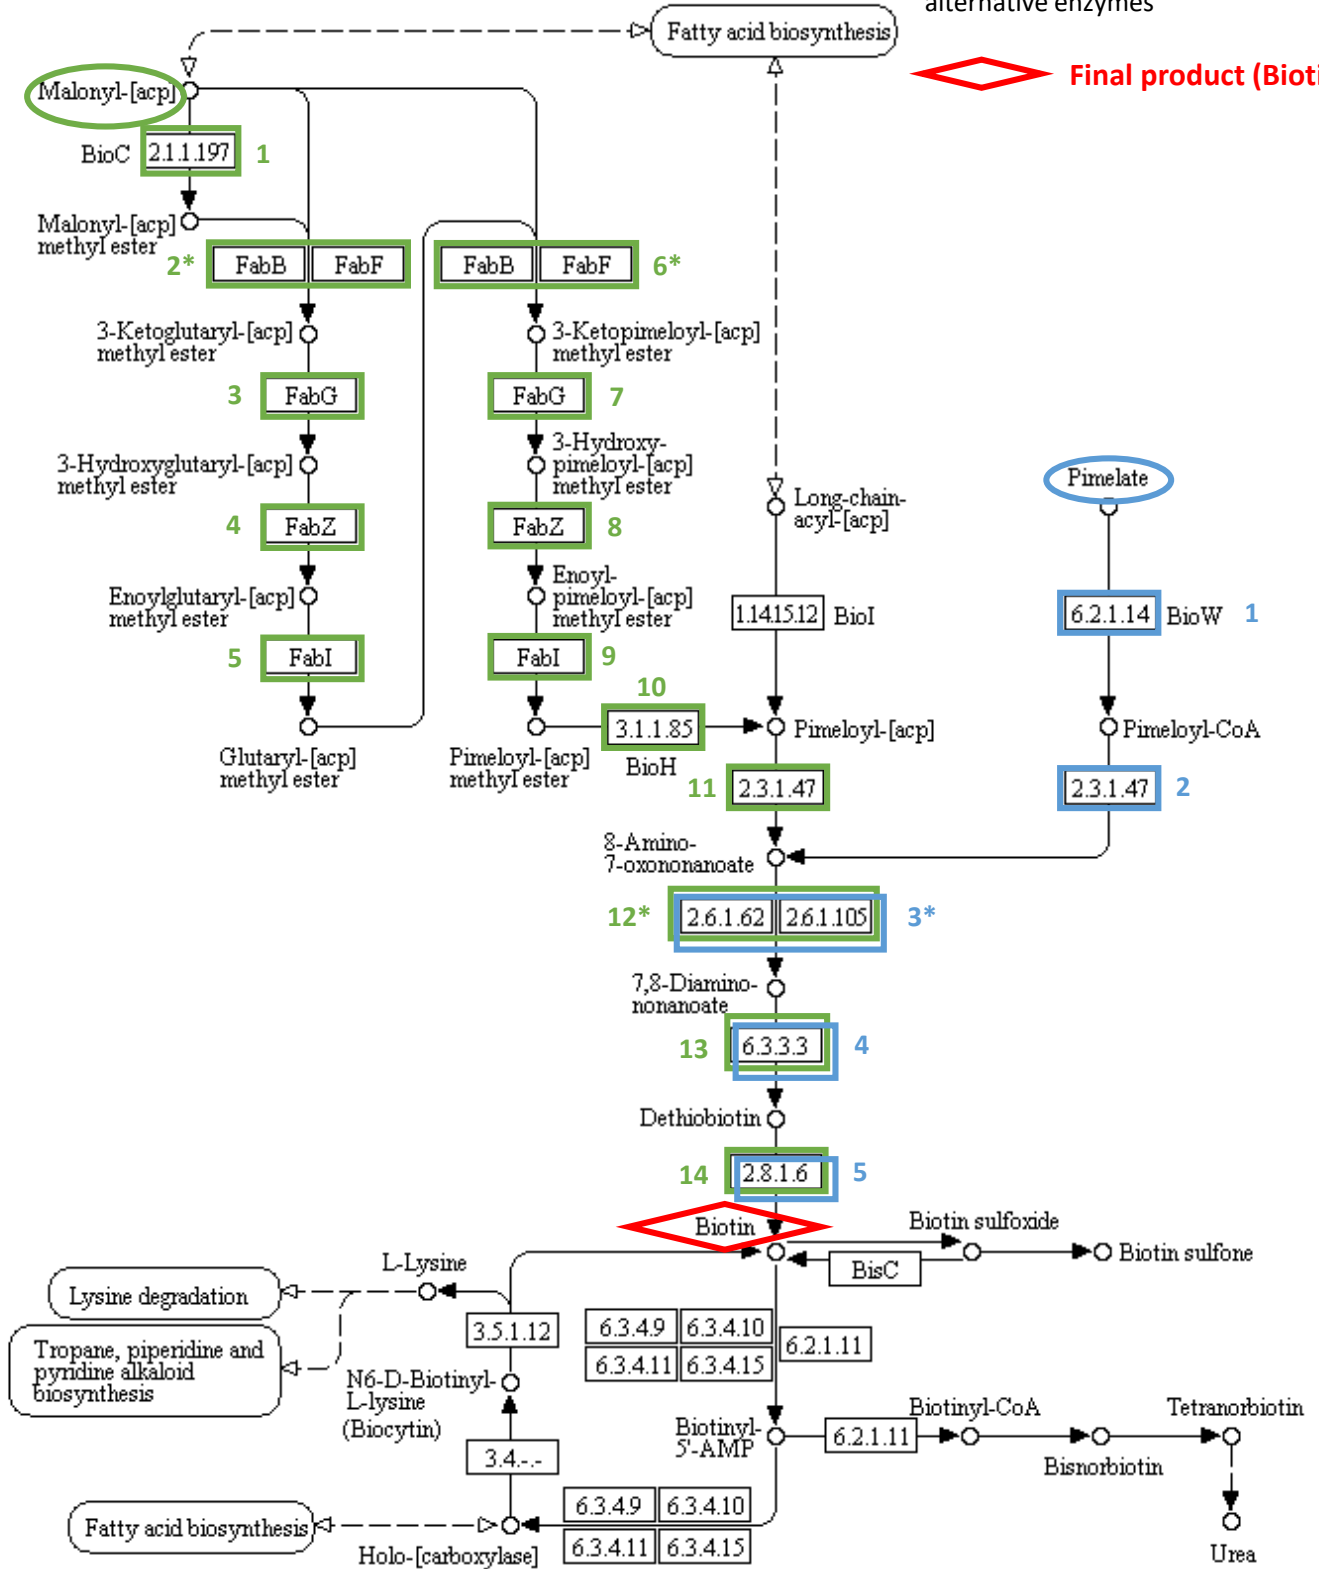

# Branch 1: Synthesis of Adenosyl cobyrinate hexaamide

- Section 1: Formation of ALA
- Section 2: Formation of Adenosyl cobyrinate hexaamide

# Branch 2: Transformation of Adenosyl cobyrinate hexaamide into Adenosine-GDP-cobinamide

- Section 1: Formation of Adenosyl cobinamide phosphate
- Section 2: Transformation of Adenosyl cobinamide phosphate to Adenosine-GDP-cobinamide

# Branch 3: Synthesis of $\alpha$ -Ribazole from 5-Aminoimidazole ribotide (based on Hazra et al., PNAS 112: 10792 (2015))

# Branch 4: Merge of Adenosine-GDP-cobinamide with $\alpha$ -Ribazole to form B12 coenzyme

**Final product (Adenosylcobalamin – B12 coenzyme)**

## ADENOSYLCOBALAMIN PATHWAY

### PORPHYRIN AND CHLOROPHYLL METABOLISM

#### Branch 1

#### Section 1

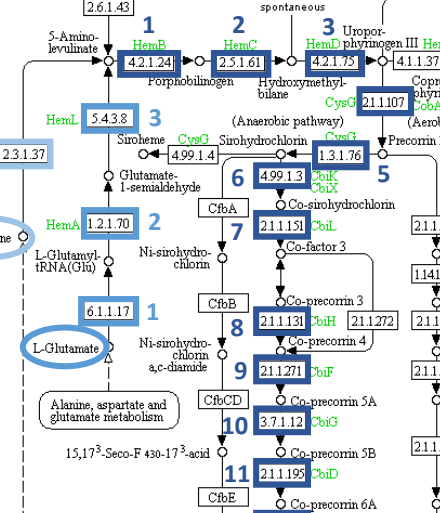

#### Section 2

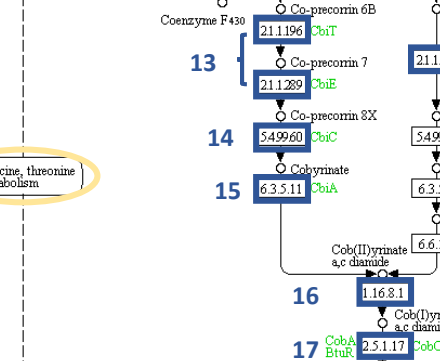

#### Branch 2

#### Section 1

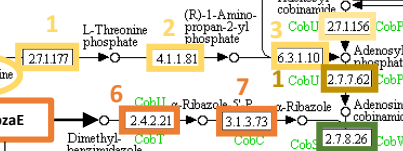

#### Section 2

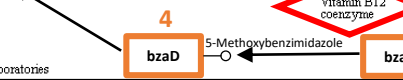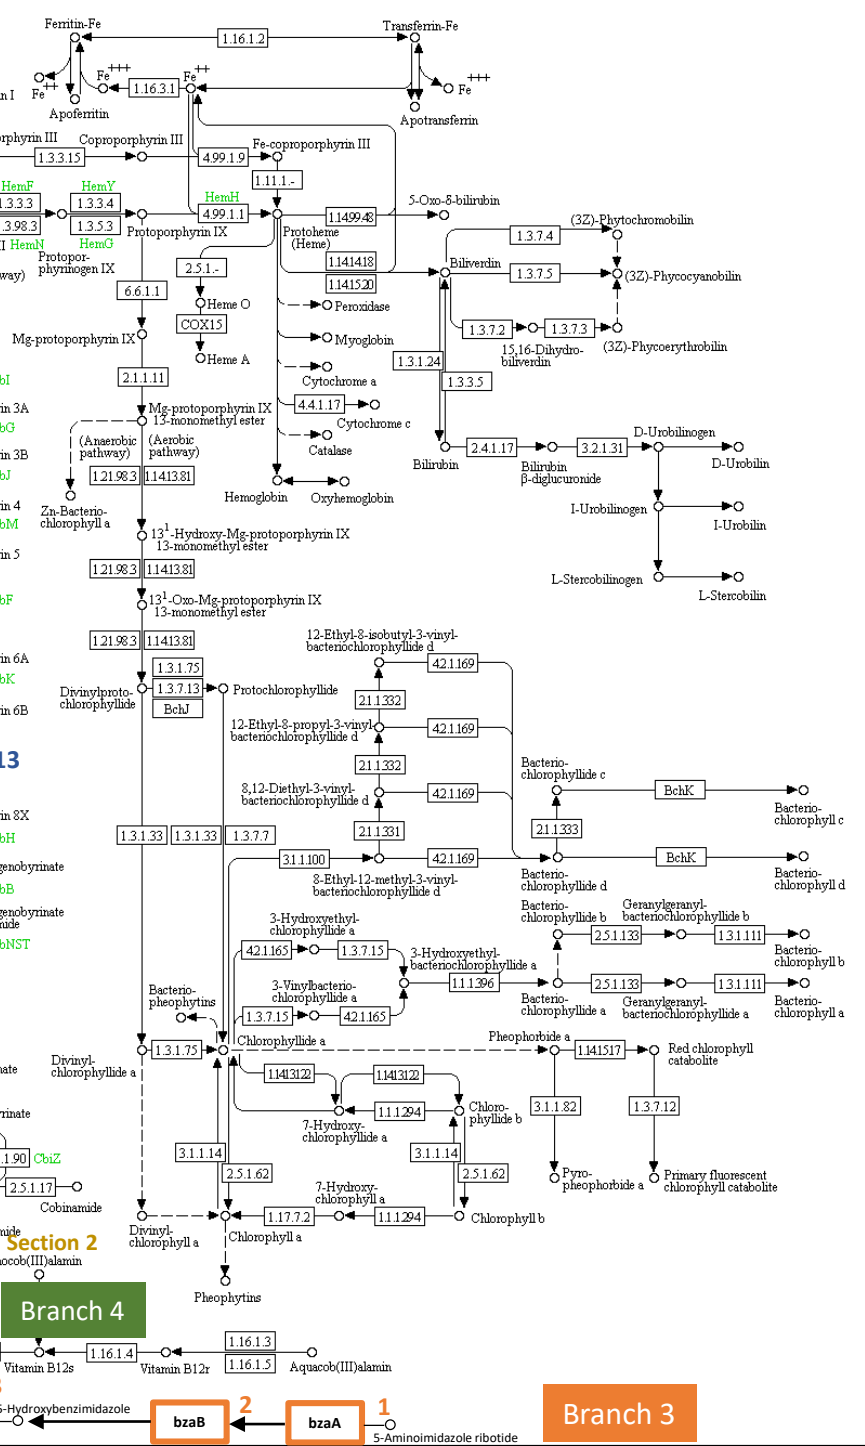

#### Branch 3

— Branch 1: Synthesis of 2-Amino-4-hydroxy-6-hydroxymethyl-7,8-dihydropteridine

— Branch 2: Synthesis of 4-Aminobenzoate

— Branch 3: Merge of final compounds from branches 1 and 2 and synthesis of DHF

◇ Final product (THF)

\* Steps that can be catalysed by alternative enzymes

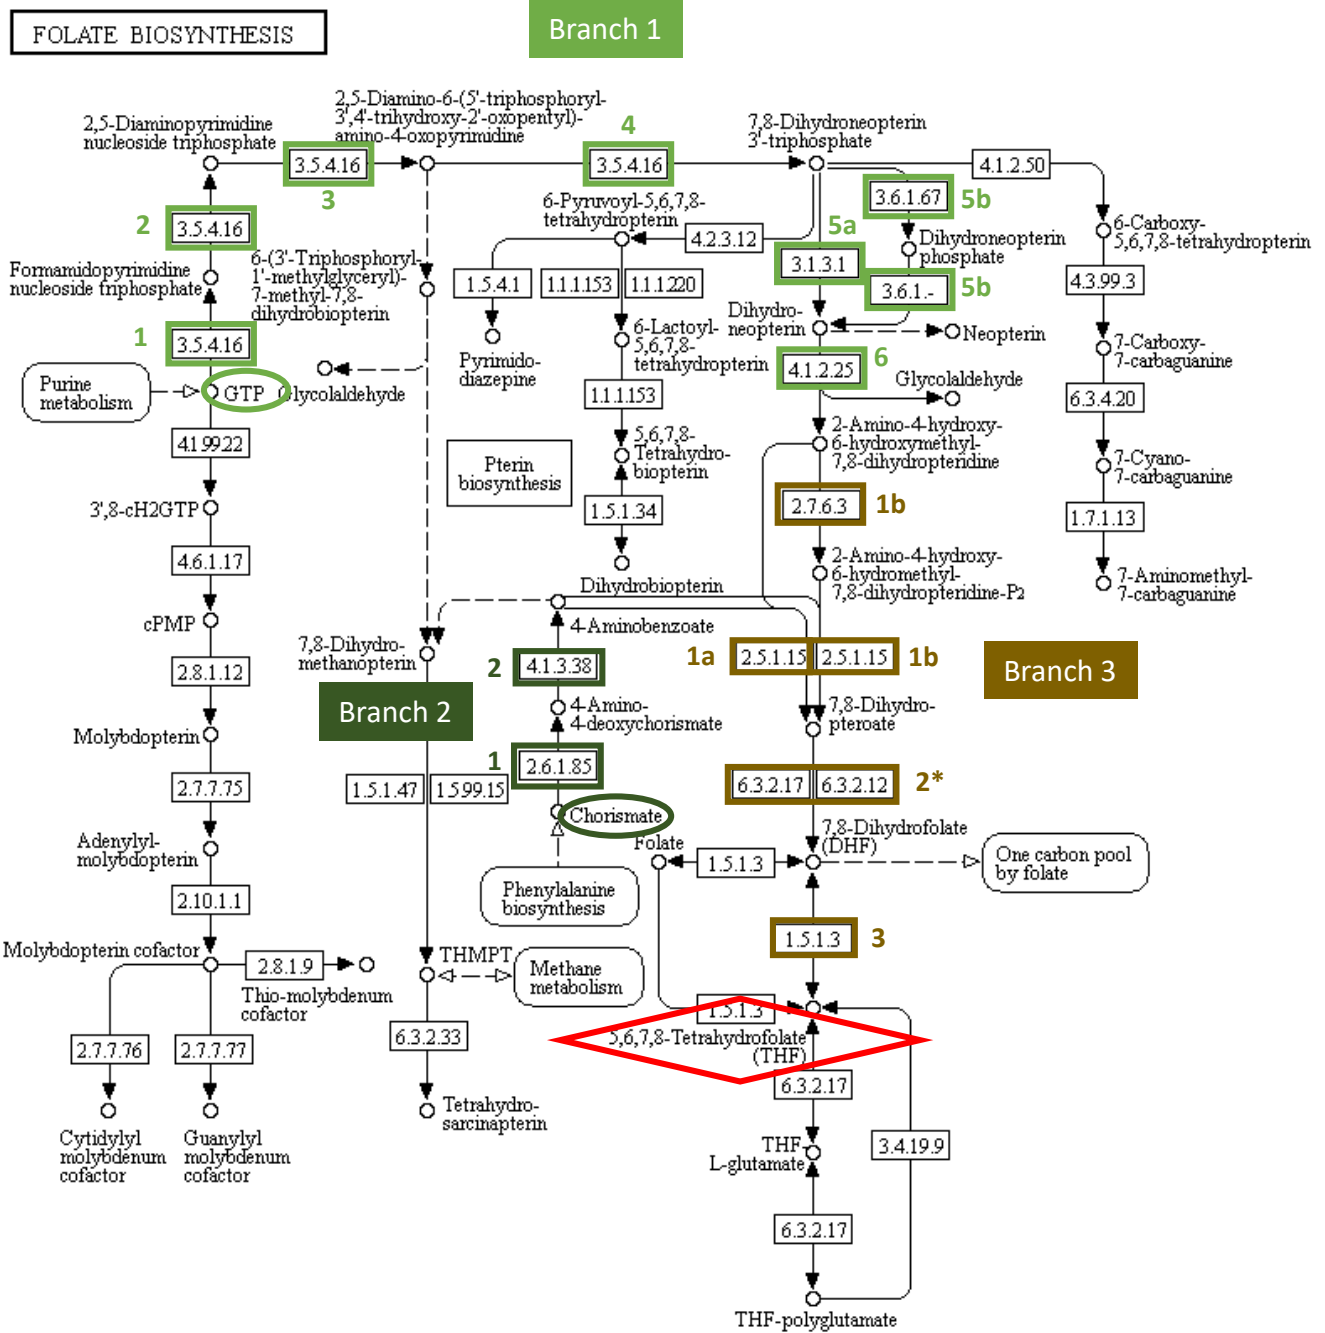

— De novo route: Synthesis from L-Aspartate

— Alternative route: Synthesis via Quinolinate produced from Tryptophan metabolism

— Salvage route 1: Synthesis from Nicotinamide

— Salvage route 2: Synthesis from Nicotinate

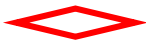

Final product (NAD<sup>+</sup>)

\* Steps that can be catalysed by alternative enzymes

### NICOTINATE AND NICOTINAMIDE METABOLISM

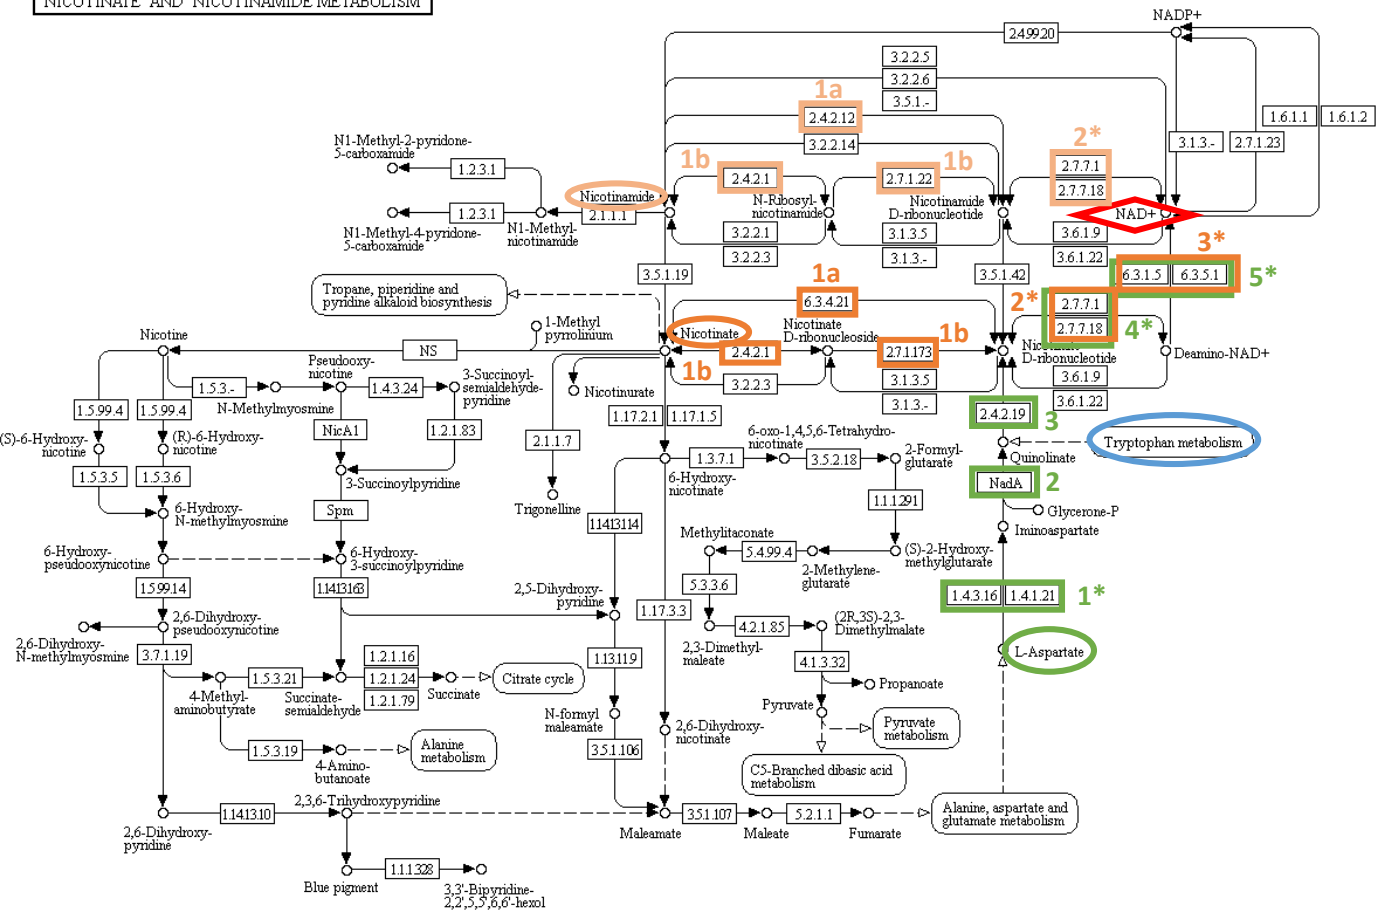

## Branch 1: Synthesis of (R)-Pantoate

- Section 1: Synthesis of 3-Methyl-2-oxobutanoate (from Pyruvate or from L-Valine)
- Section 2: Conversion of 3-Methyl-2-oxobutanoate to (R)-Pantoate

## Branch 2: Synthesis of $\beta$ -Alanine

- Alternative a: From L-Aspartate
- Alternative b: From Uracil
- Alternative c: From Propanoate metabolism

## Branch 3: Merge of (R)-Pantoate and $\beta$ -Alanine

- Section 1: Synthesis of (R)-4'-Phospho-pantothenate
- Section 2: Merge of D-4'-Phospho-pantothenate with L-Cysteine to produce CoA

## Salvage route: Use of Pantetheine

- Alternative A: Shortcut route through 4'-Phospho-pantetheine
- Alternative B: Route through (R)-Pantothenate

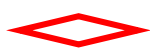

Final product (Coenzyme A)

\* Steps that can be catalysed by alternative enzymes

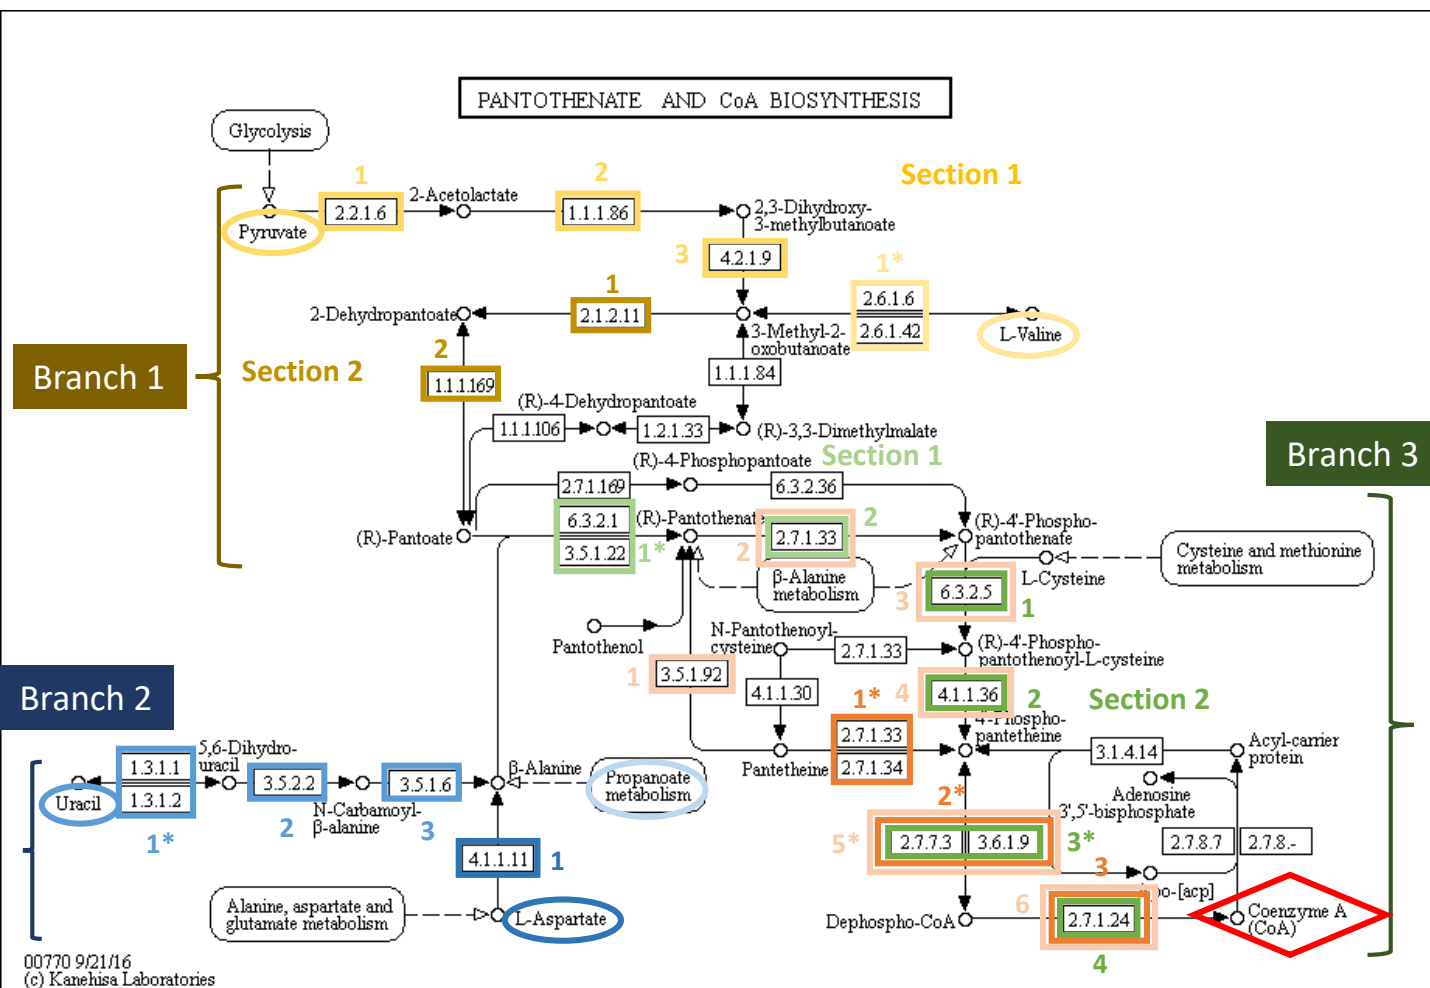

- Main route: Synthesis from D-Erythrose 4-phosphate
- Alternative route: Synthesis from Ribulose 5-phosphate + Glyceraldehyde 3-phosphate
- Salvage route 1: Synthesis from Pyridoxamine
- Salvage route 2: Synthesis from Pyridoxal
- Salvage route 3: Synthesis from Pyridoxine

◊ Final product (Pyridoxal 5-phosphate)

\* Steps that can be catalysed by alternative enzymes

VITAMIN B 6 METABOLISM

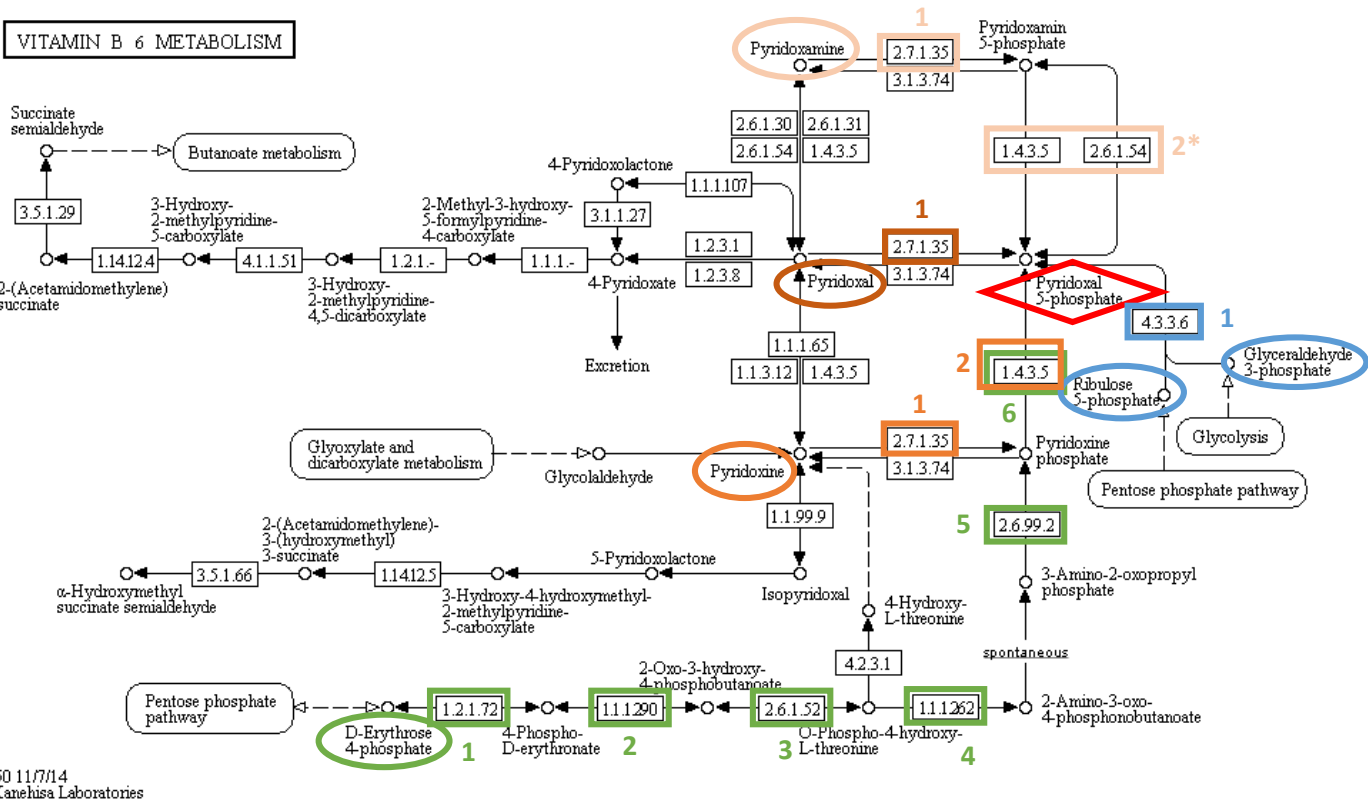

- Branch 1: Synthesis of 5-Amino-6-(ribityl-amino)uracil
- Branch 2: Synthesis of 3,4-Dihydroxy-2-butanone-4-phosphate
- Branch 3: Merge of final compounds from branches 1 and 2 and synthesis of FMN<sup>+</sup> and FAD<sup>+</sup>

◇ Final products (FMN<sup>+</sup> and FAD<sup>+</sup>)

\* Steps that can be catalysed by alternative enzymes

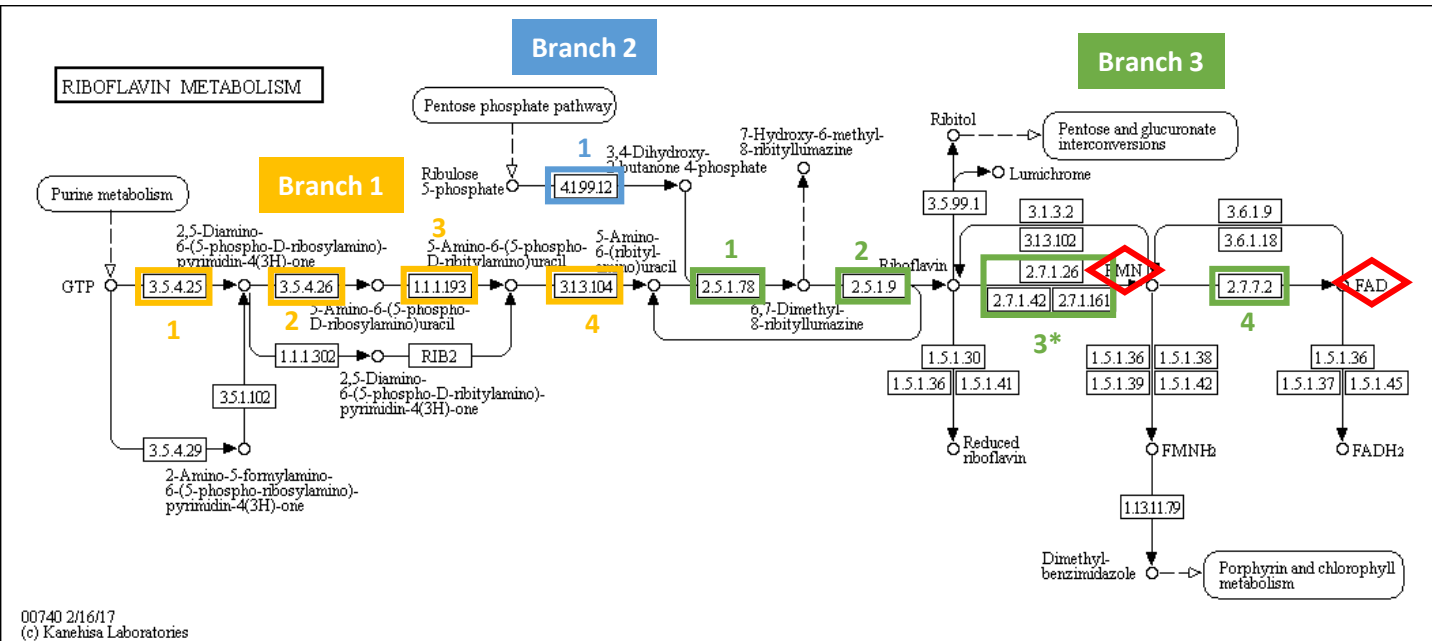



**Branch 1: Synthesis of 4-Amino-5-hydroxymethyl-2-methylpyrimidine diphosphate**

**Branch 2: Synthesis of 2-(2-Carboxy-4-methylthiazol-5-yl)ethyl phosphate**

**Section 1: Synthesis of Thiocarboxy-[sulfur-carrier protein]**

**Section 2: Synthesis of 1-Deoxy-D-Xylulose 5-phosphate**

**Section 3: Synthesis of Iminoglycine**

**Section 4: Merge of final products from sections 1, 2 and 3 and synthesis of 2-(2-Carboxy-4-methylthiazol-5-yl)ethyl phosphate**

**Branch 3: Merge of final compounds from branches 1 and 2 and synthesis of Thiamine diphosphate**

**Final product (Thiamine diphosphate)**

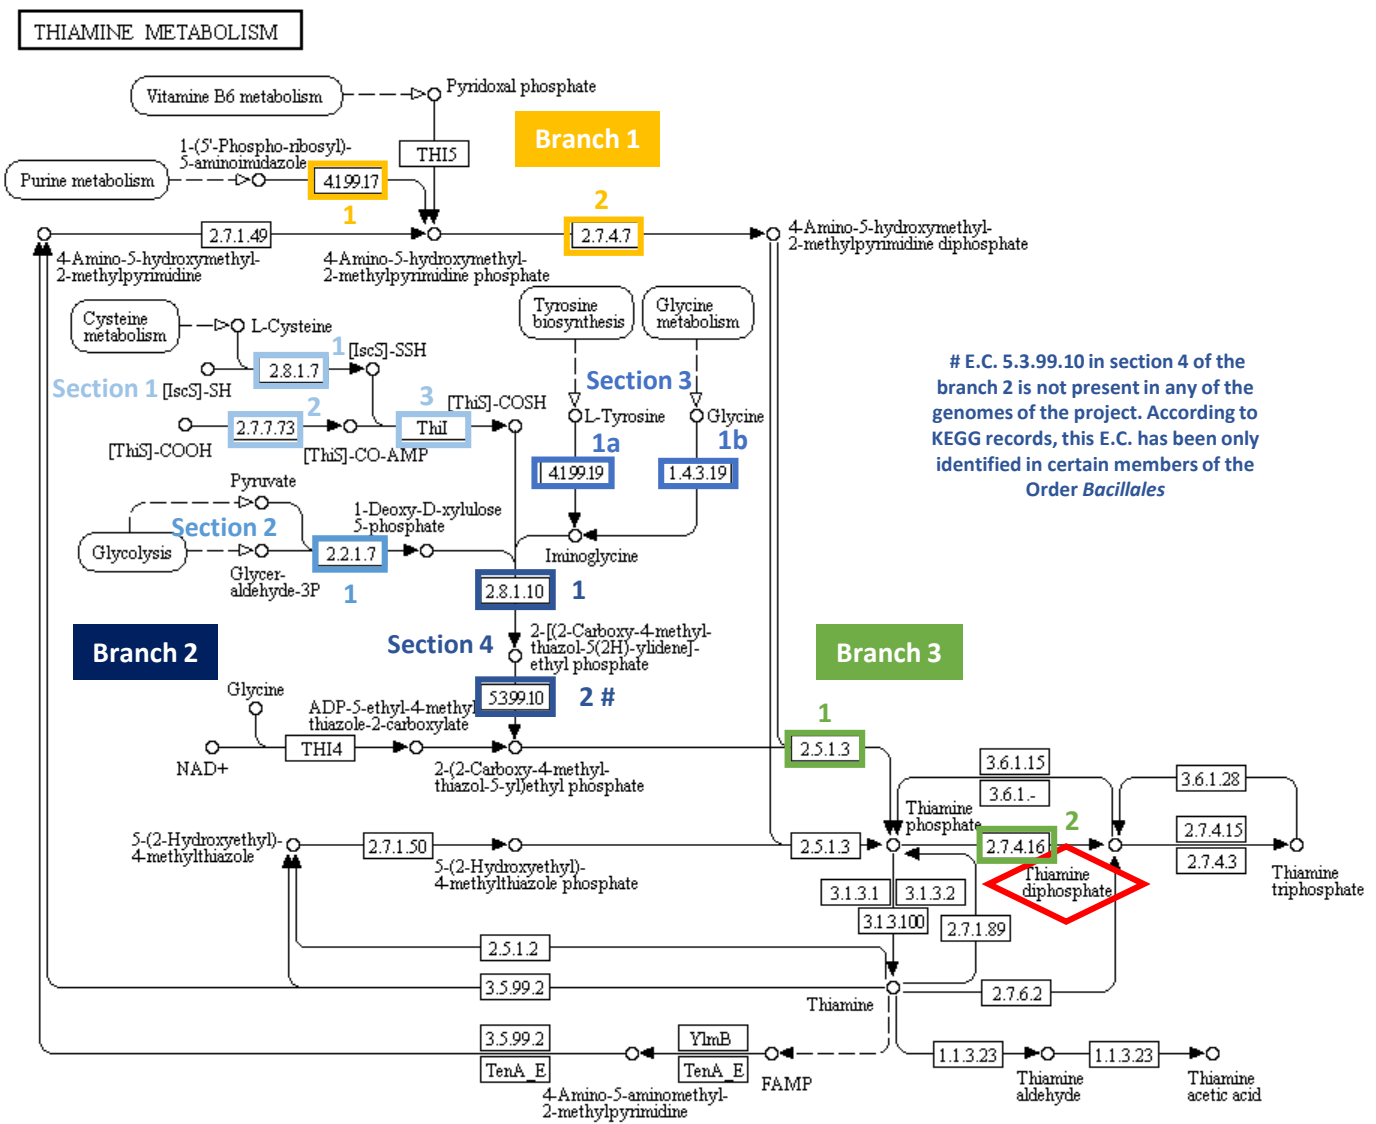

Supplement: mBio.00886-20-sf001.pdf [file mBio.00886-20-sf001.pdf]
