# Supplementary material for: Vitamin Biosynthesis by Human Gut Butyrate-Producing Bacteria and Cross-Feeding in Synthetic Microbial Communities
Source: PubMed Central journal article supplement (PMC7360928; doi:10.1128/mbio.00886-20), 2020-07-14
Supplement: mBio.00886-20-sf004.pdf [file mBio.00886-20-sf004.pdf]

**a** Overview of strains and amino acids tested in comparison to the positive control in the presence of all amino acids. The growth of strains tested in the absence of specific amino acids are highlighted. Numbers in gray refer to in silico data as per Table S2.

- Stationary OD significantly lower than positive control but overall growth very similar (see growth curves)
- Stationary OD not significantly different to positive control
- Stationary OD significantly higher than positive control but overall growth very similar (see growth curves)
- Stationary OD significantly lower than positive control
- Stationary OD significantly lower than positive control and growth rate reduced

| Amino acid absent              | Ala | Asp | Asn | Glu | Gln | Gly | Ser | Thr | Cys | Met | Val | Leu | Ile | Lys | Arg | Pro | His | Phe<br>Tyr<br>Trp*  | all<br>19 <sup>§</sup> |   |
|--------------------------------|-----|-----|-----|-----|-----|-----|-----|-----|-----|-----|-----|-----|-----|-----|-----|-----|-----|---------------------|------------------------|---|
| TOTAL NUMBER OF GENES          | 1   | 1   | 1   | 1   | 1   | 1   | 1   | 5   | 2   | 7   | 5   | 5   | 6   | 7   | 8   | 3   | 10  | 7<br>+3<br>+3<br>+7 |                        |   |
| <i>F. prausnitzii</i> A2-165   | 0?  | 0   | 0   | 0   | 0   | 0   | 0   | 0   | 0   | 0?  | 0   | 0   | 0   | 0   | 0   | 0   | 0   | 0                   | 0                      | 7 |
| <i>F. prausnitzii</i> SL3/3    | 0?  | 0   | 0   | 0   | 0   | 0   | 0   | 0   | 0   | 0?  | 0   | 0   | 0   | 0   | 0   | 0   | 0   | 0                   | 0                      | 7 |
| <i>S. variabile</i> DSM 15176  | 0?  | 0   | 0   | 0   | 0   | 0   | 0   | 0   | 0   | 0?  | 0   | 0   | 0   | 0   | 0   | 0   | 0   | 1                   | 0                      | 6 |
| <i>A. hallii</i> DSM 3353      | 0   | 0   | 1   | 0   | 0   | 0   | 0   | 0   | 0   | 0?  | 0   | 0   | 0   | 0   | 0   | 0   | 0   | 0                   | 0                      | 0 |
| <i>A. caccae</i> L1-92         | 0   | 0   | 0   | 0   | 0   | 0   | 0   | 0   | 0   | 0?  | 0   | 0   | 0   | 0   | 0   | 0   | 0   | 0                   | 0                      | 0 |
| <i>A. hadrus</i> SSC/2         | 0   | 0   | 0   | 0   | 0   | 0   | 0   | 1   | 0   | 0?  | 0   | 0   | 0   | 0   | 0   | 0   | 0   | 0                   | 0                      | 0 |
| <i>C. catus</i> GD/7           | 0?  | 0   | 0   | 0   | 0   | 0   | 0   | 0   | 0   | 0   | 0   | 0   | 0   | 0   | 0   | 0   | 0   | 0                   | 0                      | 4 |
| <i>Clostridium</i> sp. L2-50   | 0   | 0   | 0   | 0   | 0   | 0   | 0   | 0   | 0   | 0   | 0   | 0   | 0   | 0   | 0   | 0   | 0   | 0                   | 0                      | 0 |
| <i>Coprococcus</i> sp. ART55/1 | 0   | 0   | 0   | 0   | 0   | 0   | 0   | 0   | 0   | 0   | 0   | 0   | 0   | 1   | 0   | 0   | 1   | 3                   | 0                      | 1 |
| <i>E. rectale</i> A1-86        | 0   | 0   | 0   | 0   | 0   | 0   | 0   | 0   | 0   | 0   | 0   | 0   | 0   | 0   | 0   | 0   | 0   | 0                   | 0                      | 0 |
| <i>E. rectale</i> M104/1       | 0   | 0   | 0   | 0   | 0   | 0   | 0   | 0   | 0   | 0   | 0   | 0   | 0   | 0   | 0   | 0   | 0   | 0                   | 0                      | 0 |
| <i>R. faecis</i> M72/1         | 0?  | 0   | 0   | 0   | 0   | 0   | 0   | 0   | 0   | 0   | 0   | 0   | 0   | 0   | 0   | 0   | 0   | 0                   | 0                      | 0 |
| <i>R. intestinalis</i> L1-82   | 0?  | 0   | 0   | 0   | 0   | 0   | 0   | 0   | 0   | 0   | 0   | 0   | 0   | 0   | 0   | 0   | 0   | 0                   | 0                      | 0 |
| <i>R. intestinalis</i> M50/1   | 0?  | 0   | 0   | 0   | 0   | 0   | 0   | 0   | 0   | 0   | 0   | 0   | 0   | 0   | 0   | 0   | 0   | 0                   | 0                      | 0 |
| <i>R. inulinivorans</i> A2-194 | 0?  | 0   | 0   | 0   | 0   | 0   | 0   | 0   | 0   | 0   | 0   | 0   | 0   | 0   | 0   | 0   | 0   | 0                   | 0                      | 7 |

\*Total number of genes relate to chorismate biosynthesis, shared by all aromatic amino acids

<sup>§</sup>Cysteine was present

**b** Growth curves (left) and stationary OD relative to positive control (right) for all amino acid conditions and strains tested. Gray lines indicate data used for stationary OD data. The pooled standard deviations ranged between 3.9 and 30.6 per strain. Letters refer to the Tukey test results. Treatments with different a letters in common are not significantly different (P-value < 0.05).

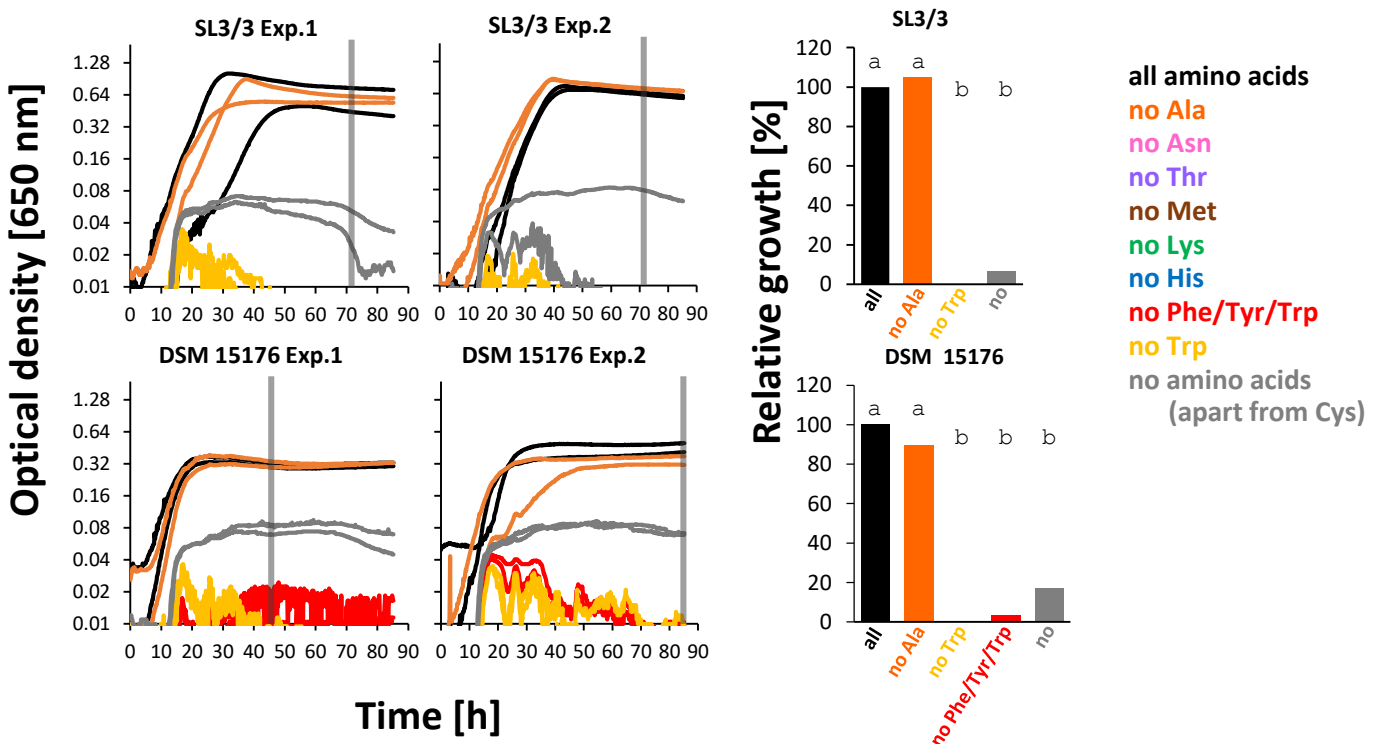

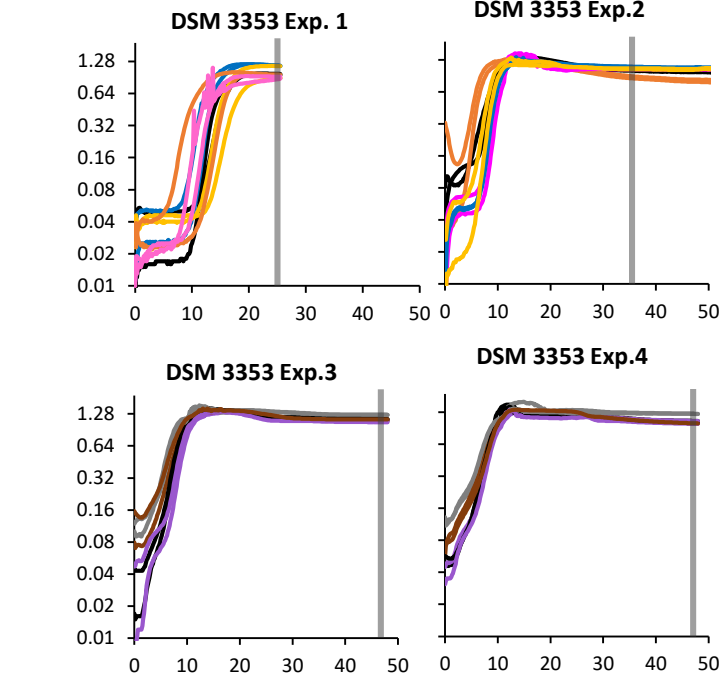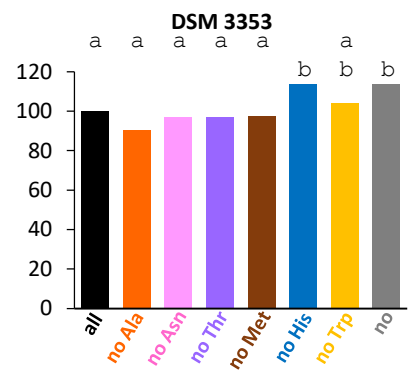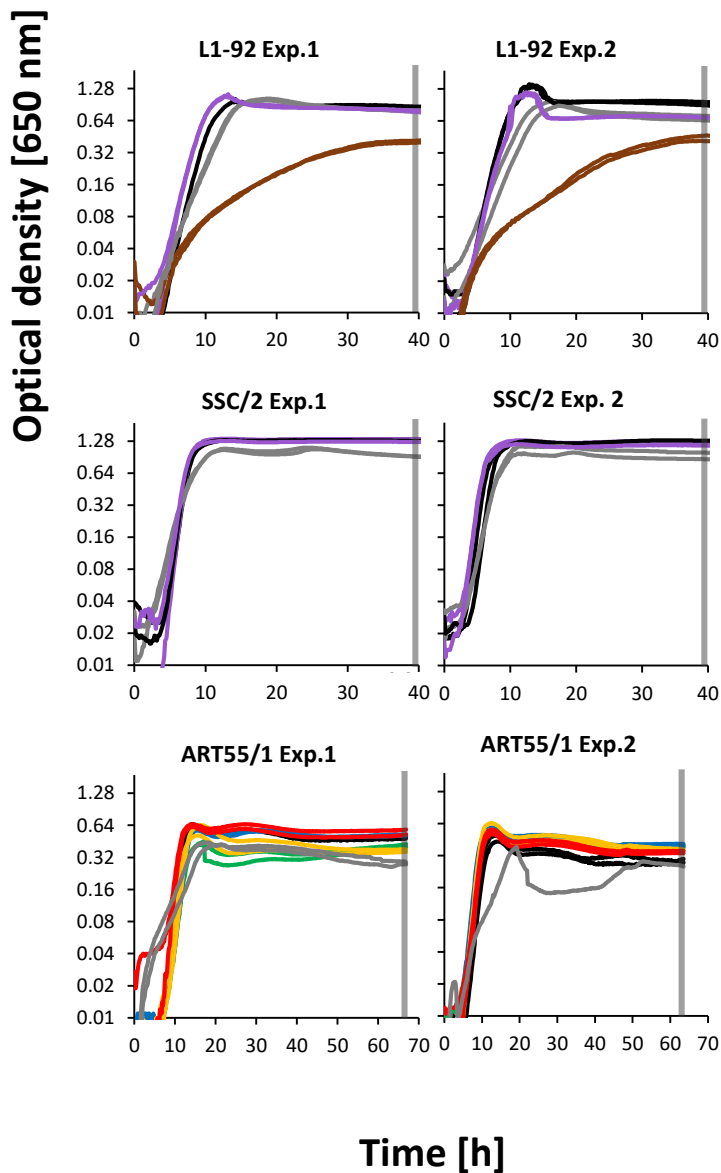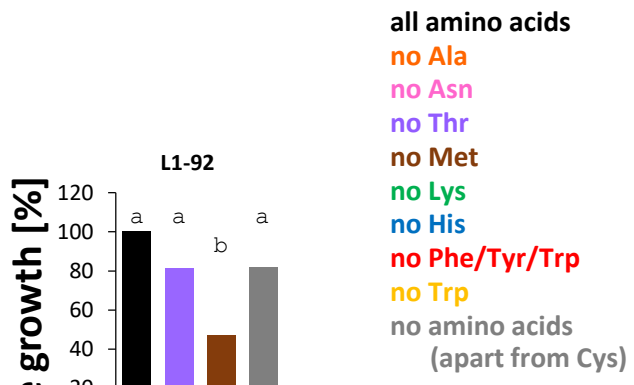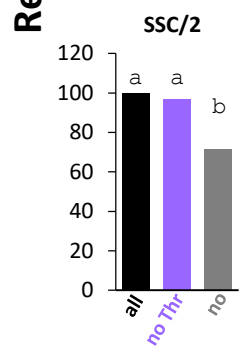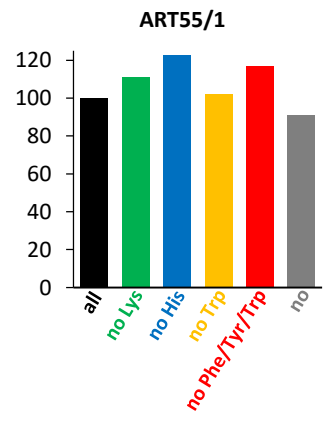

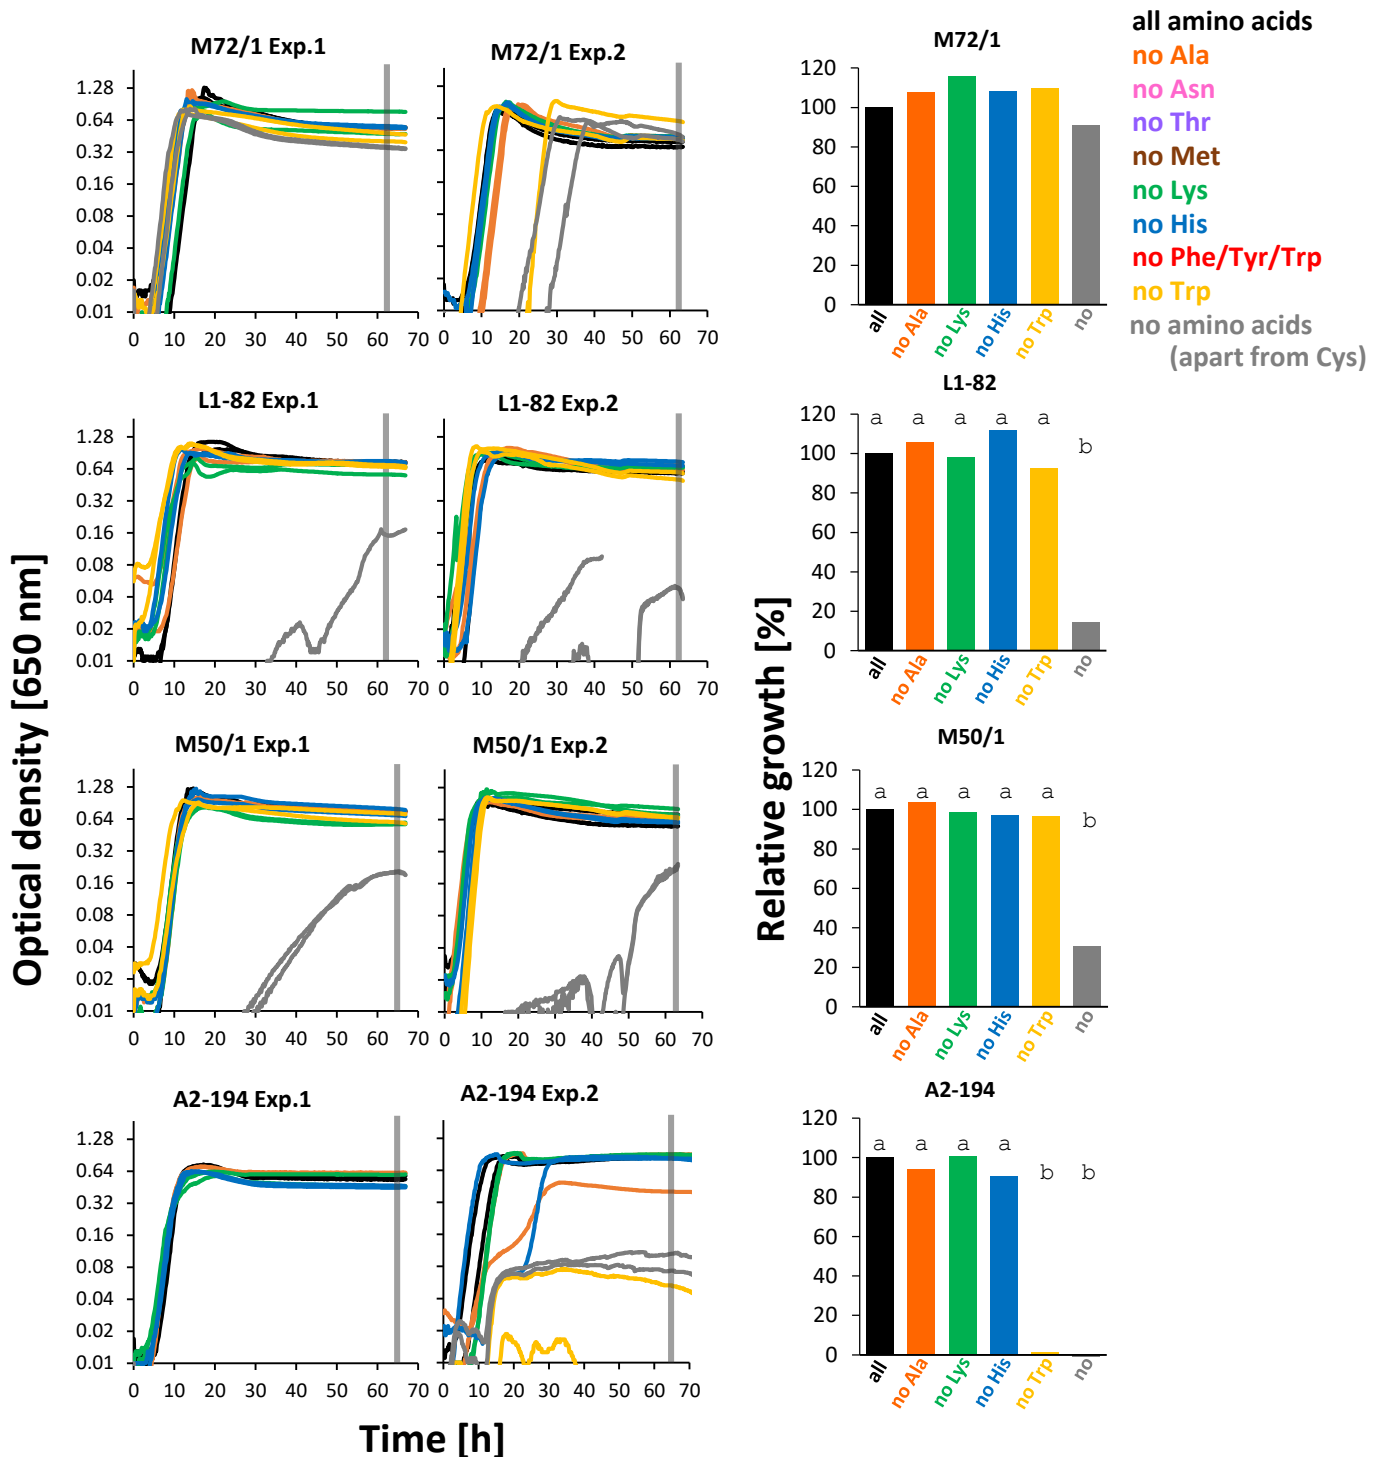

**Fig. S4** Relative growth of several butyrate producing strains in the 3rd passage of culture in AA-CDM lacking certain amino acids compared to the positive control with all amino acids present. (a) Overview of strains and amino acids tested in comparison to the positive control in the presence of all amino acids. The growth of strains tested in the absence of specific amino acids are highlighted. Numbers in gray refer to *in silico* data as per Table S2. (b) Growth curves (left) and stationary OD relative to positive control (right) for all amino acid conditions and strains tested. Gray lines indicate data used for stationary OD data. The pooled standard deviations ranged between 3.9 and 30.6 per strain. Letters refer to the Tukey test results. Treatments with different a letters in common are not significantly different (P-value < 0.05).
