# Supplementary material for: Vitamin Biosynthesis by Human Gut Butyrate-Producing Bacteria and Cross-Feeding in Synthetic Microbial Communities
Source: PubMed Central journal article supplement (PMC7360928; doi:10.1128/mbio.00886-20), 2020-07-14
Supplement: mBio.00886-20-st003.pdf [file mBio.00886-20-st003.pdf]

**Table S3** Bacterial strains used in the study and genome information (from <https://www.ncbi.nlm.nih.gov/genome/microbes/>).

| Organism <sup>1</sup>                                   | Reference  | Genome size [Mb] | Assembly level  | Number of scaffolds or contigs | Contig N50 | Contig L50 | Total assembly gap length [kb] <sup>2</sup> |
|---------------------------------------------------------|------------|------------------|-----------------|--------------------------------|------------|------------|---------------------------------------------|
| <i>Faecalibacterium prausnitzii</i> A2-165              | 1          | 3.09035          | Scaffold        | 20                             | 63,061     | 14         | 9.5                                         |
| <i>Faecalibacterium prausnitzii</i> SL3/3               | 2          | 3.21442          | Chromosome      | 1                              | 67,073     | 14         | 48.5                                        |
| <i>Subdoligranulum variabile</i> DSM 15176              | 3          | 3.24547          | Scaffold        | 11                             | 166,480    | 6          | 8.0                                         |
| <i>Anaerobutyricum hallii</i> DSM 3353                  | 4, 5       | 3.29             | Contig          | 175                            | 33,110     | 28         | 0                                           |
| <i>Anaerostipes caccae</i> DSM 14662 (L1-92)            | 1, 6       | 3.60694          | Scaffold        | 26                             | 261,254    | 4          | 1.3                                         |
| <i>Anaerostipes hadrus</i> SSC/2                        | 2          | 3.11479          | Chromosome      | 1                              | 46,563     | 22         | 63.8                                        |
| <i>Coprococcus catus</i> GD/7                           | 7          | 3.5227           | Chromosome      | 1                              | 92,485     | 12         | 59.3                                        |
| <i>Clostridium</i> sp. L2-50                            | 1, 8       | 2.95462          | Scaffold        | 20                             | 197,148    | 6          | 0.5                                         |
| <i>Coprococcus</i> sp. ART55/1                          | 2, 8       | 3.12301          | Chromosome      | 1                              | 15,489     | 53         | 235.0                                       |
| [ <i>Eubacterium</i> ] <i>rectale</i> DSM 17629 (A1-86) | 1          | 3.34495          | Chromosome      | 1                              | 80,495     | 13         | 85.9                                        |
| [ <i>Eubacterium</i> ] <i>rectale</i> M104/1            | 2          | 3.69842          | Chromosome      | 1                              | 62,843     | 18         | 131.8                                       |
| <i>Roseburia faecis</i> M72/1                           | 2          | 3.33469          | Contig          | 101                            | 143,514    | 7          | 0                                           |
| <i>Roseburia intestinalis</i> L1-82                     | 1, 9       | 4.49335          | Complete genome |                                |            |            | 0                                           |
| <i>Roseburia intestinalis</i> M50/1                     | 2          | 4.14355          | Chromosome      | 1                              | 57,879     | 22         | 82.9                                        |
| <i>Roseburia inulinivorans</i> DSM 16841 (A2-194)       | 1          | 4.04846          | Contig          | 179                            | 57,343     | 23         | 0                                           |
| <i>Bifidobacterium bifidum</i> CNCM I-3650              | This study |                  |                 |                                |            |            |                                             |
| <i>Lactobacillus paracasei</i> CNCM I-1518              | 10         |                  |                 |                                |            |            |                                             |
| <i>Streptococcus thermophilus</i> CNCM I-3862           | This study |                  |                 |                                |            |            |                                             |

<sup>1</sup>The names of the organisms are given as they are recorded on the NCBI Taxonomy website (<https://www.ncbi.nlm.nih.gov/Taxonomy/taxonomyhome.html/>).

<sup>2</sup>Based on subtraction of 'total ungapped length' from 'total sequence length' provided at <https://www.ncbi.nlm.nih.gov/genome/microbes/>.

## References

1. Barcenilla A, Pryde SE, Martin JC, Duncan SH, Stewart CS, Henderson C, Flint HJ. 2000. Phylogenetic relationships of butyrate-producing bacteria from the human gut. *Appl Environ Microbiol* 66:1654–1661.
2. Louis P, Duncan SH, McCrae SI, Millar J, Jackson MS, Flint HJ. 2004. Restricted distribution of the butyrate kinase pathway among butyrate-producing bacteria from the human colon. *J Bacteriol* 186:2099-2106.
3. Holmstrøm K, Collins MD, Møller T, Falsen E, Lawson PA. 2004. *Subdoligranulum variabile* gen. nov., sp.nov. from human feces. *Anaerobe* 10:197–203.
4. Holdeman LV, Moore WEC. 1974. New genus, *Coprococcus*, twelve new species, and emended descriptions of four previously described species of bacteria from human feces. *Int J Syst Evol Microbiol* 24:260-277.
5. Shetty SA, Zuffa S, Bui TPN, Aalvink S, Smidt H, De Vos WM. 2018. Reclassification of *Eubacterium hallii* as *Anaerobutyricum hallii* gen. nov., comb. nov., and description of *Anaerobutyricum soehngeni* sp. nov., a butyrate and propionate-producing bacterium from infant faeces. *Int J Syst Evol Microbiol* 68:3741-3746.
6. Schwartz A, Hold GL, Duncan SH, Gruhl B, Collins MD, Lawson PA, Flint HJ, Blaut M. 2002. *Anaerostipes caccae* gen. nov., sp. nov., a new saccharolytic, acetate-utilising, butyrate-producing bacterium from human faeces. *Syst Appl Microbiol* 25:46–51.
7. Reichardt N, Duncan SH, Young P, Belenguer A, McWilliam Leitch C, Scott KP, Flint HJ, Louis P. 2014. Phylogenetic distribution of three pathways for propionate production within the human gut microbiota. *ISME J* 8:1323-1335.

8. Alessi AM, Gray V, Farquharson FM, Flores-Lopez A, Shaw S, Stead D, Wegmann U, Shearman C, Gasson M, Collie-Duguid ESR, Flint HR, Louis P. 2020.  $\beta$ -glucan is a major growth substrate for human gut bacteria related to *Coprococcus eutactus*. *Environ Microbiol* 22: 2150-2164.
9. Duncan SH, Hold GL, Barcenilla A, Stewart CS, Flint HJ. 2002. *Roseburia intestinalis* sp. nov., a novel saccharolytic, butyrate-producing bacterium from human faeces. *Int J Syst Evol Microbiol* 52:1615–1620.
10. Fehlbaum S, Chassard C, Schwab C, Voolaid M, Fourmestraux C, Derrien M, Lacroix C. 2019. In vitro study of *Lactobacillus paracasei* CNCM I-1518 in healthy and *Clostridioides difficile* colonized elderly gut microbiota. *Front Nutr* 6:184.
