# Supplementary material for: Vitamin Biosynthesis by Human Gut Butyrate-Producing Bacteria and Cross-Feeding in Synthetic Microbial Communities
Source: PubMed Central journal article supplement (PMC7360928; doi:10.1128/mbio.00886-20), 2020-07-14
Supplement: mBio.00886-20-st006.pdf [file mBio.00886-20-st006.pdf]

**Table S6** Primers used for molecular community analysis

| Target                                        | Primer name                  | Primer sequence (universal tag sequence in bold)  | amplicon size |
|-----------------------------------------------|------------------------------|---------------------------------------------------|---------------|
| Universal tag primers                         | TAG-for                      | Cyanine5-AGGTGACACTATAGAATA                       |               |
|                                               | TAG-rev                      | GTACGACTCACTATAGGGA                               |               |
| <i>Corynebacterium glutamicum</i> DSMZ 1412   | tag-CGTerC_F                 | <b>AGGTGACACTATAGAATA</b> ACCACTGAGGGCGATCTTGTT   | 183           |
|                                               | tag-CGTerC_R                 | <b>GTACGACTCACTATAGGGA</b> AATGTGCTTGGCTCCGAAGA   |               |
| <i>Faecalibacterium prausnitzii</i> A2-165    | tag_Fprau_CG447_RS01330F     | <b>AGGTGACACTATAGAATA</b> ACCAGCCCCAGCATCTCTCTG   | 135           |
|                                               | tag_Fprau_CG447_RS01330R     | <b>GTACGACTCACTATAGGGA</b> GATACCGAGGGAAGAGTGGAC  |               |
| <i>Subdoligranulum variabile</i> DSM 15176    | Svar_SUBVAR_05219F           | <b>AGGTGACACTATAGAATA</b> TGGAACCGATCTCCTGCTTG    | 170           |
|                                               | Svar_SUBVAR_05219R           | <b>GTACGACTCACTATAGGGA</b> AAGCAATGAGCTGTCCGATGA  |               |
| <i>Eubacterium rectale</i> A1-86 (=DSM 17629) | tag_Erect_EUR_16390F         | <b>AGGTGACACTATAGAATA</b> AATAGCCCTCAGGCACCACTA   | 147           |
|                                               | tag_Erect_EUR_16390R         | <b>GTACGACTCACTATAGGGA</b> TGGCCTTTAAGGTGGCAACA   |               |
| <i>Roseburia intestinalis</i> M50/1           | Rint_ROI_11740F              | <b>AGGTGACACTATAGAATA</b> AATCGCAATGAATCGCCTGC    | 254           |
|                                               | Rint_ROI_11740R              | <b>GTACGACTCACTATAGGGA</b> AAGATGTCCGCCTTCACCAG   |               |
| <i>Roseburia faecis</i> M72/1                 | tag-RFTerC_F_1               | <b>AGGTGACACTATAGAATA</b> AATCAGTTCGGCTCCCTTGG    | 339           |
|                                               | tag-RFTerC_R_1               | <b>GTACGACTCACTATAGGGA</b> ACCATTGGTTCGGGTGTCGTA  |               |
| <i>Roseburia inulinivorans</i> A2-194         | tag_Rinul_ROSEINA2194_04328F | <b>AGGTGACACTATAGAATA</b> ACGCAGCAGATTTTACAGCGT   | 275           |
|                                               | tag_Rinul_ROSEINA2194_04328R | <b>GTACGACTCACTATAGGGA</b> AACCTCATGCCTTGCAATCG   |               |
| <i>Coprococcus eutactus</i> ART55/1           | tag-CETerC_F                 | <b>AGGTGACACTATAGAATA</b> GAAAGGAAAACCAGCTCGTGA   | 165           |
|                                               | tag-CETerC_R                 | <b>GTACGACTCACTATAGGGA</b> CCCTCTGCTGGAACCTCAAC   |               |
| <i>Streptococcus thermophilus</i> CNCM I-3862 | tag_S.thermo - F             | <b>AGGTGACACTATAGAATA</b> ATTATTTGAAAGGGGCAATTGCT | 318           |
|                                               | tag_S.thermo - R             | <b>GTACGACTCACTATAGGGA</b> GTGAACCTTCCACTCTCACAC  |               |
| <i>Lactobacillus paracasei</i> CNCM I-1518    | tag_OFF 2201 ex              | <b>AGGTGACACTATAGAATA</b> IIGTTAGCACCGCTTAAAGACG  | 322           |
|                                               | tag_OFF 2202 ex              | <b>GTACGACTCACTATAGGGA</b> IIGCCATAAGCGTGTTAGCCG  |               |
| <i>Bifidobacterium bifidum</i> CNCM I-3650    | tag_GeXP_Bif_genus_F1        | <b>AGGTGACACTATAGAATA</b> TGCGGTCYGGTGTGAAAG      | 165           |
|                                               | tag_GeXP_Bif_genus_Rev       | <b>GTACGACTCACTATAGGGA</b> GGTGTCTTCCCGATATCTACA  |               |
